# Supplementary material
Source: publisher site journal article supplement (https://www.dovepress.com/article/479718)
Supplement: Supplementary file 1 [file get_supplementary_file.php]

**Supplementary Material**

Focal *Staphylococcus aureus* Septic Arthritis Elicits Age and TLR2-Dependent Periarticular Bone Loss

Michelle Schultz1*, Zhicheng Hu1,2*, Meghshree Deshmukh1, Petra Henning3, Ulf H. Lerner3, Majd Mohammad1, Tao Jin1,4

1Department of Rheumatology and Inflammation Research, Institute of Medicine, Sahlgrenska Academy, University of Gothenburg, Gothenburg, Sweden

2Center for Clinical Laboratories, the Affiliated Hospital of Guizhou Medical University, Guiyang, China

3Department of Internal Medicine and Clinical Nutrition, Institute of Medicine, Sahlgrenska Osteoporosis Centre and Centre for Bone and Arthritis Research at the Sahlgrenska Academy, University of Gothenburg, Gothenburg, Sweden

4Department of Rheumatology, Sahlgrenska University Hospital, Gothenburg, Sweden

Michelle Schultz1*

Zhicheng Hu1,2*

*These authors contributed equally to this work.

E-mail: michelle.schultz@gu.se

Running title: Aging and TLR2 in Septic arthritis Mediated Bone Loss

**Sfig. 1 Aging significantly influenced the mortality rate of *Staphylococcus aureus* bacteremia in mice.** C57BL/6 wild-type (WT) mice and Toll-like receptor 2-deficient (TLR2-/-) female mice, aged from 13–28 weeks (young) and 73–89 weeks (old), respectively, were intravenously inoculated with the *S. aureus* Newman strain at a dose of 1.5x106 CFU/mouse. The cumulative survival of the mice was followed every 12 hours for 10 days post-infection. The data were pooled from 2 independent experiments. Statistical evaluations were performed using the log-rank (Mantel-cox) test.

**Sfig. 2. The blood levels of IL6 and KC in mice with staphylococcal bacteremia.** C57BL/6 wild-type (WT) and Toll-like receptor (TLR) 2–deficient (TLR2−/−) female mice, aged 13–28 weeks (young) or 73–89 weeks (old)—including WT/young, WT/old, TLR2−/−/young, and TLR2−/−/old groups—were intravenously inoculated with the *Staphylococcus aureus* Newman WT strain at a dose of 1.5 × 106 colony-forming units per mouse. Surviving mice were euthanized on day 10 after infection.  Peripheral blood levels of interleukin 6 (A) and keratinocyte-derived chemokine (KC) were analyzed. Data were pooled from 2 independent experiments. Statistical evaluations were performed using 1-way ANOVA with Kruskal-Wallis test with Dunn's posttest. Lines in dot plots represent medians.
